# Supplementary material for: DcR3 induces epithelial-mesenchymal transition through activation of the TGF-β3/SMAD signaling pathway in CRC
Source: PubMed Central journal article supplement (PMC5363587; doi:10.18632/oncotarget.12639), 2016-10-13
Supplement: oncotarget-07-77306-s001.pdf [file oncotarget-07-77306-s001.pdf]

## DcR3 induces epithelial-mesenchymal transition through activation of the TGF- $\beta$ 3/SMAD signaling pathway in CRC

### SUPPLEMENTARY FIGURES AND TABLES

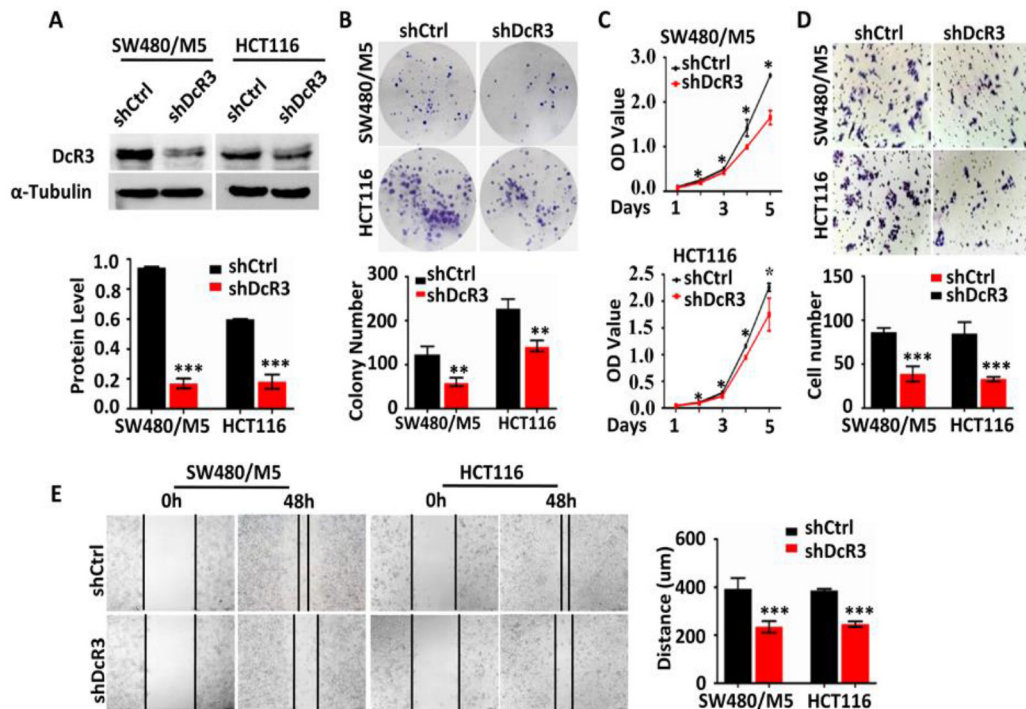

**Supplementary Figure S1: Knockdown of DcR3 expression inhibited CRC cells proliferation and migration *in vitro*.** A. SW480/M5 and HCT116 cells were stably transfected with scramble (shCtrl) or DcR3 shRNA (shDcR3), DcR3 shRNA effectively blocked its protein expression in SW480/M5 and HCT116 cells (Upper panels). DcR3 protein levels were normalized to  $\alpha$ -Tubulin (Lower panel). \*\*\* $P < 0.001$  compared to control group,  $n = 3$ . B-C. Knockdown of DcR3 inhibited cell proliferation as measured by colony formation assay (B) and CCK8 assay (C), \* $P < 0.05$ , \*\* $P < 0.01$  compared to shCtrl groups or that in each corresponding time point,  $n = 3$ . D-E. Knockdown of DcR3 markedly attenuated SW480/M5 and HCT116 cells migration as measured by transwell migration assays (D) and wound-healing assay (E). \*\*\* $P < 0.001$  compared to control group,  $n = 3$ .

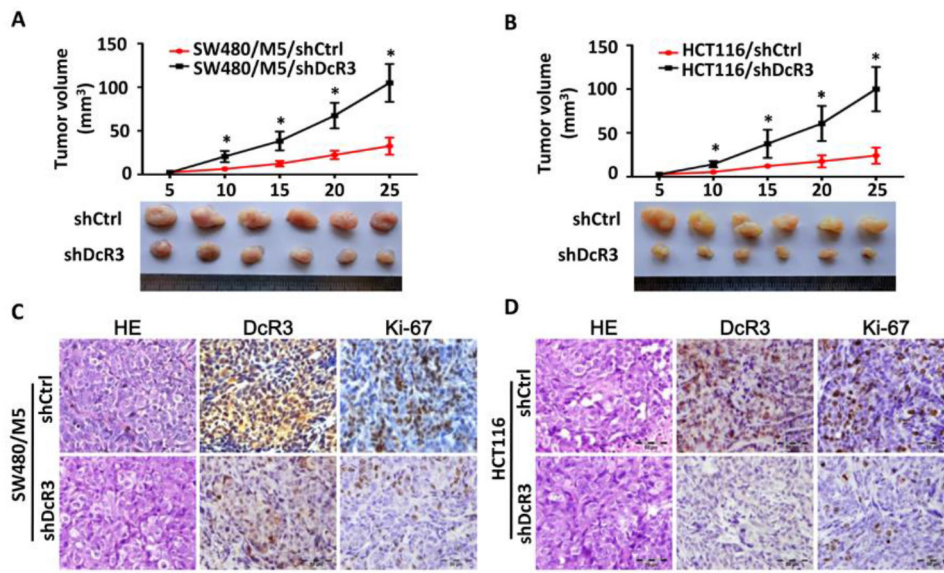

**Supplementary Figure S2: Knockdown of DcR3 inhibited tumor growth and metastasis *in vivo*.** A-B. GFP-labeled SW480/M5 and HCT116 cells with stable transfection of control (shCtrl) or DcR3 shRNA (shDcR3) were injected subcutaneously into nude mice as described in Methods. 25 days later, the tumors were removed and imaged (lower panels). Tumor growth curves were obtained by using a whole-body GFP imaging system during the growth of the tumors (upper panels). Tumors derived from cells expressing shDcR3 grew significantly smaller than that from cells with shCtrl. \*P<0.001 compared to shCtrl group in each corresponding time point for both A and B, n=6. C-D. Representative photographs of H&E, DcR3 and Ki-67 immunohistochemistry staining of the primary tumor tissues from nude mice.

**Supplementary Table S1: Clinicopathological characteristics of patients and DcR3 protein expression in CRC tissues**

| Characteristic   |                | DcR3 Expression: No. of Patients (%) |           | P     |
|------------------|----------------|--------------------------------------|-----------|-------|
|                  |                | High                                 | Low       |       |
| Age(y)           | ≥50            | 49 (72.1)                            | 19 (27.9) | 0.989 |
|                  | <50            | 13(72.2)                             | 5 (27.8)  |       |
| Gender           | Male           | 40(70.2)                             | 17 (29.8) | 0.578 |
|                  | Female         | 22(75.9)                             | 7 (24.1)  |       |
| Differentiation  | High           | 16(53.3)                             | 14 (46.7) | 0.006 |
|                  | Moderate       | 27 (79.4)                            | 7 (20.6)  |       |
|                  | Low            | 19(86.4)                             | 3 (13.6)  |       |
| Infiltration     | Mucous layer   | 1 (20.0)                             | 4 (80.0)  | 0.046 |
|                  | Muscular layer | 5 (71.4)                             | 2 (28.6)  |       |
|                  | Full layer     | 57 (76.0)                            | 18 (24.0) |       |
| Lymph metastasis | Yes            | 44 (81.5)                            | 10 (18.5) | 0.012 |
|                  | No             | 18 (56.2)                            | 14 (43.8) |       |

**Supplementary Table S2: Univariate analyses of various prognosis parameters in 86 CRC patients using cox regression model**

|                  | <b>B</b> | <b>SE</b> | <b>Wald</b> | <b>P</b> | <b>95%CI</b> |
|------------------|----------|-----------|-------------|----------|--------------|
| DcR3             | -1.322   | 0.491     | 7.245       | 0.007    | 0.102±0.698  |
| Age              | 0.037    | 0.014     | 7.085       | 0.008    | 1.010±1.066  |
| Gender           | -0.129   | 0.353     | 0.133       | 0.715    | 0.440±1.756  |
| Differentiation  | -0.041   | 0.190     | 0.045       | 0.831    | 0.661±1.394  |
| Infiltration     | 1.478    | 0.721     | 4.203       | 0.040    | 1.067±18.013 |
| Lymph metastasis | 1.745    | 0.376     | 21.592      | <0.001   | 2.743±11.957 |
